# Supplementary material
Source: ML conference proceedings conference paper supplement (https://proceedings.neurips.cc/paper_files/paper/2019/hash/a588a6199feff5ba48402883d9b72700-Abstract.html)
Supplement: Supplementary file [file a588a6199feff5ba48402883d9b72700-Supplemental.zip]

## 1 Proofs from Section 3.1

2 We start with pseudocode for RR1.

---

### Algorithm 1 RR1

---

**Input:**  $\varepsilon, i, j$

1:  $y_i \leftarrow \lfloor x_i / 2^j \rfloor \bmod 4$

2: **if**  $p \sim_U [0, 1] \leq \frac{e^\varepsilon}{e^\varepsilon + 3}$  **then**

3:   User  $i$  publishes  $\tilde{y}_i \leftarrow y_i$

4: **else**

5:   User  $i$  publishes  $\tilde{y}_i \sim_u (\{0, 1, 2, 3\} \setminus \{y_i\})$

6: **end if**

**Output:** Private user estimate  $\tilde{y}_i$  of  $\mu(j)$

---

3 Next, we prove the privacy guarantee for KVGUSSTIMATE.

4 **Theorem 1.1.** KVGUSSTIMATE satisfies  $(\varepsilon, 0)$ -local differential privacy for  $x_1, \dots, x_n$ .

5 *Proof.* As KVGUSSTIMATE is sequentially interactive, each user only produces one output. It  
6 therefore suffices to show that each randomized response routine used in KVGUSSTIMATE is  
7  $(\varepsilon, 0)$ -locally private. In RR1, for any possible inputs  $x, x'$  and output  $y$  we have

$$\frac{\mathbb{P}[\text{RR1}(x) = y]}{\mathbb{P}[\text{RR1}(x') = y]} \leq \frac{e^\varepsilon / (e^\varepsilon + 3)}{1 / (e^\varepsilon + 3)} \leq e^\varepsilon$$

8 so RR1 is  $(\varepsilon, 0)$ -locally private. KVRR2 is  $(\varepsilon, 0)$ -locally private by similar logic.  $\square$

9 We now prove the accuracy guarantee for KVGUSSTIMATE. First, recall that  $\hat{H}_1$  is the aggregation  
10 (via KVAGG1) of user responses (via RR1). Let  $H_1$  be the “true” histogram,  $H_1^j(a) = |\{y_i \mid i \in$   
11  $U_1^j, y_i = a\}|$  for all  $a \in \{0, 1, 2, 3\}$  and  $j \in \mathcal{L}$ . Since the analyst only has access to  $\hat{H}_1$ , we need to  
12 show that  $\hat{H}_1$  and  $H_1$  are similar.

13 **Lemma 1.2.** With probability at least  $1 - \beta$ , for all  $j \in \mathcal{L}$ ,

$$\|\hat{H}_1^j - H_1^j\|_\infty \leq \left(\frac{\varepsilon+4}{\varepsilon\sqrt{2}}\right) \cdot \sqrt{k \ln(8L/\beta)}.$$

14 *Proof.* Choose  $a \in \{0, 1, 2, 3\}$  and  $j \in \mathcal{L}$ .  $\mathbb{E}[C^j(a)] = \frac{H_1^j(a)e^\varepsilon}{e^\varepsilon + 3} + \frac{k - H_1^j(a)}{e^\varepsilon + 3} = \frac{H_1^j(a)(e^\varepsilon - 1) + k}{e^\varepsilon + 3}$ , so by a  
15 pair of Chernoff bounds on the  $k$  users in  $U_1^j$ , with probability at least  $1 - \beta/4L$ ,

$$|C^j(a) - \frac{H_1^j(a)(e^\varepsilon - 1) + k}{e^\varepsilon + 3}| \leq \sqrt{k \ln(8L/\beta)/2}.$$

16 Then since  $\hat{H}_1^j(a) = \frac{e^\varepsilon + 3}{e^\varepsilon - 1} \cdot (C^j(a) - \frac{k}{e^\varepsilon + 3})$ , this implies

$$|\hat{H}_1^j(a) - H_1^j(a)| \leq \frac{e^\varepsilon + 3}{e^\varepsilon - 1} \cdot \sqrt{k \ln(8L/\beta)/2} < \left(\frac{\varepsilon+4}{\varepsilon\sqrt{2}}\right) \cdot \sqrt{k \ln(8L/\beta)}$$

17 where the last step uses  $\frac{e^\varepsilon + 3}{e^\varepsilon - 1} < \frac{\varepsilon+4}{\varepsilon}$ . Union bounding over  $a \in \{0, 1, 2, 3\}$  and all  $L$  groups  $U_1^j$   
18 completes the proof.  $\square$

19 Next, we show how the analyst uses  $\hat{H}_1$  to estimate  $\mu$  through ESTMEAN. Intuitively, in subgroup  $U_1^j$   
20 when user responses concentrate in a single bin  $\bmod 4$ , this suggests that  $\mu$  lies in the corresponding  
21 bin. In the other direction, when user responses do not concentrate in a single bin, users with points  
22 near  $\mu$  must spread out over multiple bins, suggesting that  $\mu$  lies near the boundary between bins. We  
23 formalize this intuition in ESTMEAN and Lemma 1.3.

24 **Lemma 1.3.** Conditioned on the success of the preceding lemmas, with probability at least  $1 - \beta$ ,  
25  $|\hat{\mu}_1 - \mu| \leq 2\sigma$ .

26 *Proof.* Recall the definitions of  $\psi$ ,  $M_1(j)$ , and  $M_2(j)$  from the pseudocode for EST-  
 27 MEAN:  $\psi = \left(\frac{\varepsilon+4}{\varepsilon\sqrt{2}}\right) \cdot \sqrt{k \ln(8L/\beta)}$ ,  $M_1(j) = \arg \max_{a \in \{0,1,2,3\}} \hat{H}_1^j(a)$ , and  $M_2(j) =$   
 28  $\arg \max_{a \in \{0,1,2,3\} - \{M_1(j)\}} \hat{H}_1^j(a)$ . We start by proving two useful claims.

29 Claim 1: With probability at least  $1 - \beta/5$ , for all  $j \in \mathcal{L}$  where  $2^j > \sigma$ , if  $j' = L_{\max}, L_{\max} - 1, \dots, j + 1$   
 30 all have  $\hat{H}_1^{j'}(M_1(j)) \geq 0.52k + \psi$ , then  $\mu \in I_j$ .

31 To see why, suppose  $2^j > \sigma$  and let  $x \sim N(\mu, \sigma^2)$ . Recall the Gaussian CDF  $F(x) =$   
 32  $\frac{1}{2} \left[ 1 + \operatorname{erf} \left( \frac{x-\mu}{\sigma\sqrt{2}} \right) \right]$ . Then for any  $a \not\equiv \lfloor \mu/2^j \rfloor \pmod{4}$

$$\mathbb{P}[\lfloor x/2^j \rfloor \equiv a \pmod{4}] \leq \mathbb{P}[x \notin [\mu, \mu + 3 \cdot 2^j]] < \mathbb{P}[x \notin [\mu, \mu + 3\sigma]] < 0.51$$

33 where the second inequality uses  $2^j > \sigma$ . Thus by a binomial Chernoff bound, the assumption  
 34  $k > 5000 \ln(5L/\beta)$ , and Lemma 1.2, with probability  $\geq 1 - \beta/5L$ ,  $\hat{H}_1^j(a) < 0.52k + \psi$ . Therefore if  
 35 for some  $a$  we have  $\hat{H}_1^j(a) \geq 0.52k + \psi$ ,  $a \equiv \lfloor \mu/2^j \rfloor \pmod{4}$ . Moreover, if  $\mu \in I_j$  then letting  $c$  be the  
 36 (unique) integer such that  $c \equiv M_1(j) \pmod{4}$  and  $c2^j \in I_j$  (since  $I_j$  has endpoints  $c_1 2^j$  and  $(c_1 + 2)2^j$   
 37 for integer  $c_1$ ) we get  $\mu \in [c2^j, (c+1)2^j] = I_j$ . As  $\mu \in I_{L_{\max}}$  by our assumed lower bound on  $n$ , the  
 38 claim follows by induction.

39 Claim 2: Let  $j$  be the maximum  $j \in \mathcal{L}$  with  $\hat{H}_1^j(M_1(j)) < 0.52k + \psi$ , and let  $c^*$  be the maximum  
 40 integer such that  $c^* 2^j \in I_j$  and  $c^* \equiv M_1(j)$  or  $M_2(j) \pmod{4}$ . If  $2^j > \sigma$ , then with probability at least  
 41  $1 - 4\beta/5$ ,  $|c^* 2^j - \mu| \leq 2\sigma$ .

42 To see why, first note that by Claim 1,  $\mu \in I_j$ . Let  $[c2^j, (c+1)2^j]$  be the subinterval of  $I_j$  containing  
 43  $\mu$  for integer  $c$ . Then as  $2^j > \sigma$ , for  $x \sim N(\mu, \sigma^2)$ , by another application of the Gaussian CDF,

$$\mathbb{P}[x \in [c2^j, (c+1)2^j]] > \mathbb{P}[x \in [\mu, \mu + \sigma]] \geq 0.34.$$

44 Thus by the same method as above, using the assumption  $k > 5000 \ln(5/\beta)$ , with probability at least  
 45  $1 - \beta/5$ ,  $\hat{H}_1^j(c \pmod{4}) \geq 0.33k - \psi$ . By similar logic, since

$$\mathbb{P}[\lfloor x/2^j \rfloor \equiv c + 2 \pmod{4}] < \max_{\lambda \in [0, 2^j]} \mathbb{P}[x \notin [\mu - 2^j - \lambda, \mu + 2 \cdot 2^j - \lambda]] < \mathbb{P}[x \notin [\mu - \sigma, \mu + 2\sigma]] \leq 0.19$$

46 with probability at least  $1 - \beta/5$ ,  $\hat{H}_1^j(c + 2 \pmod{4}) \leq 0.2k + \psi$ . Next, consider  $\hat{H}_1^j(c - 1 \pmod{4})$ . If  
 47  $\mu \geq (c + 0.75)2^j$ , then

$$\mathbb{P}[x \in [(c-1)2^j, c2^j]] \leq \mathbb{P}[x \notin [\mu - 3\sigma/4, \mu + 9\sigma/4]] \leq 0.24$$

48 so with probability at least  $1 - \beta/5$

$$\hat{H}_1^j(c - 1 \pmod{4}) \leq 0.25k + \psi < 0.33k - \psi \leq \hat{H}_1^j(c \pmod{4})$$

49 where the middle inequality uses  $k > 625 \left(\frac{\varepsilon+4}{\varepsilon\sqrt{2}}\right)^2 \ln(4L/\beta)$ . Thus  $c \equiv M_1(j)$  or  $M_2(j) \pmod{4}$ ; the  
 50  $\mu \leq (c + 0.25)2^j$  case is symmetric. If instead  $\mu \in ((c + 0.25)2^j, (c + 0.75)2^j)$  then by similar logic  
 51 with probability at least  $1 - \beta/5$

$$\hat{H}_1^j(c \pmod{4}) \geq 0.36k - \psi.$$

52 so by  $\psi < 0.08k$  (implied by  $k > 40 \left(\frac{\varepsilon+4}{\varepsilon\sqrt{2}}\right)^2 \ln(8L/\beta)$ )  $c \equiv M_1(j)$  or  $M_2(j) \pmod{4}$ . It follows that  
 53 with probability at least  $1 - 3\beta/5$  in all cases  $c \equiv M_1(j)$  or  $M_2(j) \pmod{4}$ . Moreover, by a similar  
 54 application of the Gaussian CDF, one of  $c - 1 \pmod{4}$  and  $c + 1 \pmod{4}$  lies in  $\{M_1(j), M_2(j)\}$  as  
 55 well.

56 Recalling that  $c^*$  is the maximum integer such that  $c^* 2^j \in I_j$  and  $c^* \equiv M_1(j)$  or  $M_2(j) \pmod{4}$ ,  
 57  $c^* - 1 \pmod{4} \in \{M_1(j), M_2(j)\}$  as well. Assume  $|c^* 2^j - \mu| > 2\sigma$ . By above,  $\mu \in [c^* 2^j, (c^* + 1)2^j]$   
 58 or  $[(c^* - 1)2^j, (c^* 2^j)]$ . In the first case,

$$\mathbb{P}[\lfloor x/2^j \rfloor \equiv c^* - 1 \pmod{4}] \leq \mathbb{P}[x \notin [\mu - 2\sigma, \mu + 2\sigma]] \leq 0.05$$

so with probability at least  $1 - \beta/5$ ,  $\hat{H}_1^j(c^* - 1) \leq 0.06k + \psi$ , a contradiction of  $c^* - 1 \bmod 4 \in \{M_1(j), M_2(j)\}$ . In the second case,

$$\mathbb{P}[\lfloor x/2^j \rfloor \equiv c^* \bmod 4] \leq \mathbb{P}[x \notin [\mu - 2\sigma, \mu + 2\sigma]] \leq 0.05$$

and with probability at least  $1 - \beta/5$ ,  $\hat{H}_1^j(c^*) \leq 0.06k + \psi$ , contradicting  $c^* \bmod 4 \in \{M_1(j), M_2(j)\}$ . Thus  $|c^* 2^j - \mu| \leq 2\sigma$ .

We put these facts together in ESTMEAN as follows: let  $j_1$  be the maximum element of  $\mathcal{L}$  such that  $\hat{H}_1^{j_1}(M_1(j)) < 0.52k - \psi$ . If  $2^{j_1} > \sigma$ , then by Fact 2 setting  $\hat{\mu}_1 = c^* 2^{j_1}$  implies  $|\hat{\mu}_1 - \mu| \leq 2\sigma$ . If instead  $2^{j_1} \leq \sigma$ , then any setting of  $\hat{\mu}_1 \in I_{j_1}$  (including  $\hat{\mu}_1 = c^* 2^{j_1}$ ) guarantees  $|\hat{\mu}_1 - \mu| \leq 2^{j_1+1} \leq 2\sigma$ . Thus in all cases, with probability at least  $1 - \beta$ ,  $|\hat{\mu}_1 - \mu| \leq 2\sigma$ .  $\square$

The results above give the analyst an (initial) estimate  $\hat{\mu}_1$  such that  $|\hat{\mu}_1 - \mu| \leq 2\sigma$ . This concludes our analysis of round one of KVGAUSSTIMATE. Now, the analyst passes this estimate  $\hat{\mu}_1$  to users  $i \in U_2$ , and each user uses  $\hat{\mu}_1$  to center their value  $x_i$  and randomized respond on the resulting  $(x_i - \hat{\mu}_1)/\sigma$  in KVRR2. The analyst then aggregates these results using KVAGG2. We now prove that this centering process results in a more accurate final estimate  $\hat{\mu}_2$  of  $\mu$ .

**Lemma 1.4.** *Conditioned on the success of the previous lemmas, with probability at least  $1 - \beta$  KVGAUSSTIMATE outputs  $\hat{\mu}_2$  such that*

$$|\hat{\mu}_2 - \mu| = O\left(\frac{\sigma}{\varepsilon} \sqrt{\frac{\log(1/\beta)}{n}}\right).$$

*Proof.* The proof is broadly similar to that of Theorem B.1 in Braverman et al. [1], with some modifications for privacy. First, by Lemma 1.3  $\mu - \hat{\mu}_1 \in [-2\sigma, 2\sigma]$ . Letting  $\bar{\mu} = (\mu - \hat{\mu}_1)/\sigma$  we get that  $x'_i \sim N(\bar{\mu}, 1)$ . Next, since  $\mathbb{E}[y_i] = 2\mathbb{P}[x'_i \geq 0] - 1$ , and in general

$$\Phi_{\mu, \sigma^2}(x) = \frac{1}{2} \left( 1 + \operatorname{erf}\left(\frac{x - \mu}{\sigma\sqrt{2}}\right) \right)$$

where  $\Phi_{\mu, \sigma^2}$  is the CDF of  $N(\mu, \sigma^2)$ , by  $\Phi_{\bar{\mu}, 1}(0) = \mathbb{P}[x'_i \geq 0]$  we get  $\mathbb{E}[y_i] = \operatorname{erf}(\bar{\mu}/\sqrt{2})$  (note that we are analyzing the unprivatized values  $y_i$  to start; later, we will use this analysis to prove the analogous result for the privatized values  $\tilde{y}_i$ ).

A Chernoff bound on  $[-1, 1]$ -bounded random variables then shows that, with probability at least  $1 - \beta/2$ , for  $y = \frac{2}{n} \sum_{i \in U_2} y_i$  we have

$$|y - \operatorname{erf}(\bar{\mu}/\sqrt{2})| \leq 2\sqrt{\ln(4/\beta)/n}$$

and by  $\mathbb{E}[y] = \operatorname{erf}(\bar{\mu}/\sqrt{2})$  we get  $|y - \mathbb{E}[y]| \leq 2\sqrt{\ln(4/\beta)/n}$  as well.

Since  $\mu - \hat{\mu}_1 \in [-2\sigma, 2\sigma]$ ,  $|\operatorname{erf}(\bar{\mu}/\sqrt{2})| \leq \operatorname{erf}(\sqrt{2})$ . Thus  $|\mathbb{E}[y]| \leq \operatorname{erf}(\sqrt{2})$ , so by  $|y - \mathbb{E}[y]| \leq 2\sqrt{\ln(4/\beta)/n}$  we get

$$|y| \leq \operatorname{erf}(\sqrt{2}) + 2\sqrt{\ln(4/\beta)/n}.$$

Using  $n > 20000 \ln(4/\beta)$  we get  $2\sqrt{\ln(4/\beta)/n} < 0.01$  and  $\operatorname{erf}(\sqrt{2}) < 0.96$ , so  $|y| \leq 0.97$  and thus  $|y| < \operatorname{erf}(1.6)$ . Let  $M$  be an upper bound on the Lipschitz constant for  $\operatorname{erf}^{-1}$  in  $[-0.97, 0.97]$ ,

$$\begin{aligned} M &= \max_{x \in [-0.97, 0.97]} \frac{d\operatorname{erf}^{-1}(x)}{dx} \\ &= \max_{x \in [-0.97, 0.97]} \frac{\sqrt{\pi}}{2} \exp([\operatorname{erf}^{-1}(x)]^2) \\ &\leq \frac{\sqrt{\pi}}{2} \exp([\operatorname{erf}^{-1}(0.97)]^2) < 10. \end{aligned}$$

Then for any  $x, y \in [-0.97, 0.97]$  we have  $|\operatorname{erf}^{-1}(x) - \operatorname{erf}^{-1}(y)| \leq M|x - y|$ , so setting  $T = \sqrt{2}\operatorname{erf}^{-1}(y)$ ,

$$\begin{aligned} |T - \bar{\mu}| &= |\sqrt{2}(\operatorname{erf}^{-1}(y) - \operatorname{erf}^{-1}(\mathbb{E}[y]))| \leq 10\sqrt{2}|y - \mathbb{E}[y]| \\ &\leq 20\sqrt{2\ln(4/\beta)/n} \end{aligned}$$

89 using the bound on  $|y - \mathbb{E}[y]|$  from above.

90 It remains to analyze the privatized values  $\{\tilde{y}_i\}$  and bound  $|T - \hat{T}|$ , recalling that we set

$$\hat{T} = \sqrt{2} \cdot \text{erf}^{-1} \left( \frac{2(-\hat{H}_2(-1) + \hat{H}_2(1))}{n} \right)$$

91 in KVAGG1. By a Chernoff bound analogous to that of Lemma 1.2, with probability at least  $1 - \beta/2$

$$|T - \hat{T}| \leq \sqrt{2} \left| \text{erf}^{-1}(|y|) - \text{erf}^{-1} \left( |y| + \left\lceil \frac{\varepsilon + 2}{\varepsilon} \right\rceil \sqrt{\frac{2 \ln(4/\beta)}{n}} \right) \right|.$$

92 Using  $n > 20000 \left( \frac{\varepsilon + 2}{\varepsilon} \right)^2 \ln(4/\beta)$  (which implies  $\left\lceil \frac{\varepsilon + 2}{\varepsilon} \right\rceil \sqrt{\frac{2 \ln(4/\beta)}{n}} \leq 0.01$ ) and the same derivative  
93 trick as above on  $[-0.98, 0.98]$ , we get

$$|T - \hat{T}| \leq 14 \left\lceil \frac{\varepsilon + 2}{\varepsilon} \right\rceil \sqrt{\frac{2 \ln(4/\beta)}{n}}.$$

94 Therefore by the triangle inequality

$$|\hat{T} - \bar{\mu}| \leq \left( 20 + 14 \left\lceil \frac{\varepsilon + 2}{\varepsilon} \right\rceil \right) \sqrt{\frac{2 \ln(4/\beta)}{n}}$$

95 and by  $\sigma \bar{\mu} = \mu - \hat{\mu}_1$  we get

$$|\sigma \hat{T} - \sigma \bar{\mu}| = |(\sigma \hat{T} + \hat{\mu}_1) - \mu| \leq \sigma \left( 20 + 14 \left\lceil \frac{\varepsilon + 2}{\varepsilon} \right\rceil \right) \sqrt{\frac{2 \ln(4/\beta)}{n}}.$$

96 Thus by taking  $\hat{\mu}_2 = \sigma \hat{T} + \hat{\mu}_1$ , we get

$$|\hat{\mu}_2 - \mu| = O \left( \frac{\sigma}{\varepsilon} \sqrt{\frac{\log(1/\beta)}{n}} \right).$$

97

□

## 98 2 Proofs from Section 3.2

99 We start with full pseudocode for 1ROUNDKVGAUSSTIMATE.

---

### Algorithm 2 1ROUNDKVGAUSSTIMATE

---

**Input:**  $\varepsilon, k_1, k_2, \mathcal{L}, n, R, S, \sigma, U_1, U_2$

```

1: for  $j \in \mathcal{L}$  do
2:   for user  $i \in U_1^j$  do
3:     User  $i$  outputs  $\tilde{y}_i \leftarrow \text{RR1}(\varepsilon, i, j)$ 
4:   end for
5: end for
6: for  $j \in R$  do
7:   for user  $i \in U_2^j$  do
8:     User  $i$  outputs  $\tilde{y}_i \leftarrow \text{1ROUNDKVRR2}(\varepsilon, i, S(j))$ 
9:   end for
10: end for
11: Analyst computes  $\hat{H}_1 \leftarrow \text{KVAGG1}(\varepsilon, k_1, \mathcal{L}, U_1)$ 
12: Analyst computes  $\hat{\mu}_1 \leftarrow \text{ESTMEAN}(\beta, \varepsilon, \hat{H}_1, k_1, \mathcal{L}, )$ 
13: Analyst computes  $j^* \leftarrow \arg \min_{j \in R} \min_{s \in S(j)} |s - \hat{\mu}_1|$ 
14: Analyst computes  $\hat{H}_2 \leftarrow \text{KVAGG2}(\varepsilon, k_2, U_2^{j^*})$ 
15: Analyst computes  $\hat{T} \leftarrow \sqrt{2} \cdot \text{erf}^{-1} \left( \frac{-\hat{H}_2(-1) + \hat{H}_2(1)}{k_2} \right)$ 
16: Analyst outputs  $\hat{\mu}_2 \leftarrow \sigma \hat{T} + \arg \min_{s \in S(j^*)} |s - \hat{\mu}_1|$ 
Output: Analyst estimate  $\hat{\mu}_2$  of  $\mu$ 

```

---

▷ End of round 1

100 1ROUNDKVGAUSSTIMATE's privacy guarantee follows from the same analysis of randomized  
 101 response as in KVGAUSSTIMATE, so we state the guarantee but omit its proof.

102 **Theorem 2.1.** 1ROUNDKVGAUSSTIMATE satisfies  $(\varepsilon, 0)$ -local differentially privacy for  $x_1, \dots, x_n$ .

103 We define  $k$  (here denoted  $k_1$ ),  $\mathcal{L}$ ,  $U_1$ , and  $U_2$  as in KVGAUSSTIMATE. As 1ROUNDKVGAUSSTI-  
 104 MATE's treatment of users in  $U_1$  is identical to that of KVGAUSSTIMATE, we skip its analysis, instead  
 105 recalling its final guarantee:

106 **Lemma 2.2.** With probability at least  $1 - \beta$ ,  $|\hat{\mu}_1 - \mu| \leq 2\sigma$ .

107 This brings us to  $U_2$ , and we define new parameters as follows. For neatness, let  $\rho = \lceil 2\sqrt{\ln(4n)} \rceil \geq$   
 108  $\lceil \sqrt{2\ln(2\sqrt{n})} + 2.1 \rceil$  for  $n \geq 32$ . We set  $R = \{0.2\sigma, 0.4\sigma, \dots, \rho\sigma\}$  and split  $U_2$  into  $|R| = 5\rho$  groups  
 109 indexed by  $j \in R$ , each of size  $k_2 \geq \lfloor n/2|R| \rfloor \geq \lfloor \frac{n}{20\sqrt{\ln(4n)}} \rfloor = \Omega(n/\sqrt{\log(n)})$ , where the last  
 110 inequality uses  $n \geq 25$ . Finally, for each  $j \in R$  we define  $S(j) = \{j + b\rho\sigma \mid b \in \mathbb{Z}\}$ .

111 With this setup, for each  $j \in R$  each user  $i \in U_2^j$  uses 1ROUNDKVRR2 to execute a group-specific  
 112 version of KVRR2: rather than centering by  $\hat{\mu}_1$  as in KVRR2, user  $i$  now centers by the nearest  
 113 point in  $S(j)$  (breaking ties arbitrarily).

---

**Algorithm 3** 1ROUNDKVRR2

---

**Input:**  $\varepsilon, i, S(j)$

- 1: User  $i$  computes  $z_i \leftarrow \arg \min_{z \in S(j)} |z_i - x_i|$
- 2: User  $i$  computes  $y_i \leftarrow \text{sgn}((x_i - z_i)/\sigma)$
- 3: User  $i$  computes  $c \sim_U [0, 1]$
- 4: **if**  $c \leq \frac{e^\varepsilon}{e^\varepsilon + 1}$  **then**
- 5:   User  $i$  publishes  $\tilde{y}_i \leftarrow y_i$
- 6: **else**
- 7:   User  $i$  publishes  $\tilde{y}_i \leftarrow -y_i$
- 8: **end if**

**Output:** Private centered user estimate  $\tilde{y}_i$

---

114 To analyze 1ROUNDKVRR2, we first prove that users in each group draw points concentrated around  
 115  $\mu$ .

116 **Lemma 2.3.** With probability at least  $1 - \beta$ , for all  $j \in R$ , group  $U_2^j$  contains  $\leq 2\sqrt{k_2}$  users  $i$  such  
 117 that  $|x_i - \mu| > \sigma\sqrt{\ln(4n)}$ .

118 *Proof.* First, by a Gaussian tail bound, for each user  $i$ ,  $\mathbb{P}[|x_i - \mu| \geq \sigma\sqrt{\ln(4n)}] \leq 1/\sqrt{n}$ . Let  $U_C^j$   
 119 denote the users in group  $U_2^j$  such that  $|x_i - \mu| > \sigma\sqrt{\ln(4n)}$ . Then by a binomial Chernoff bound

$$\mathbb{P}\left[|U_C^j| > \frac{k_2}{\sqrt{n}} + \sqrt{\frac{3k_2 \ln(|R|/\beta)}{\sqrt{n}}}\right] \leq \beta/|R|$$

120 so using  $n \geq 9 \ln(|R|/\beta)^2$  and union bounding over  $|R| = \Omega(\sqrt{\log(n)})$  groups, the claim follows.  $\square$

121 In particular, this implies that for  $j^* = \arg \min_{j \in R} \min_{s \in S(j^*)} |s - \hat{\mu}_1|$  (i.e., the group with element  
 122 of  $S(j^*)$  closest to  $\hat{\mu}_1$ ), most users draw points in  $[\mu - \sigma\sqrt{\ln(4n)}, \mu + \sigma\sqrt{\ln(4n)}]$ . Let  $s^* =$   
 123  $\min_{s \in S(j^*)} |s - \hat{\mu}_1|$ . Our final accuracy result will rely on two facts. First, most users in  $U_2^{j^*}$  center  
 124 using  $s^*$ . Second, the randomized responses of users who center with  $s^*$  are “almost as good” as if  
 125 they were centered by  $\mu$ .

126 **Lemma 2.4.** Conditioned on the success of the previous lemmas, with probability at least  $1 - \beta$ ,  
 127 1ROUNDKVGAUSSTIMATE outputs  $\hat{\mu}_2$  such that

$$|\hat{\mu}_2 - \mu| = O\left(\frac{\sigma}{\varepsilon} \sqrt{\frac{\log(1/\beta)\sqrt{\log(n)}}{n}}\right).$$

128 *Proof.* Because adjacent points in  $R$  are  $0.2\sigma$  apart,  $|s^* - \hat{\mu}_1| \leq 0.1\sigma$ . Lemma 2.2 and the triangle  
 129 inequality then imply that  $|s^* - \mu| \leq 2.1\sigma$ . This enables us to mimic the proof of Lemma 1.4, replacing  
 130  $\mu - \hat{\mu}_1 \in [-2\sigma, 2\sigma]$  with  $\mu - s^* \in [-2.1\sigma, 2.1\sigma]$ .

131 We can decompose users in  $U_2^{j*}$  into those with points within  $\sigma\rho$  of  $s^*$  and those with more distant  
 132 points. Denote the first set of users by  $V$  and the second set by  $V^c$ , and recall that the Gaussian CDF  
 133 is

$$\Phi_{\mu, \sigma^2}(x) = \frac{1}{2} \left( 1 + \operatorname{erf} \left( \frac{x - \mu}{\sigma\sqrt{2}} \right) \right).$$

134 Then, letting  $\mathbb{1}$  denote the indicator function,

$$\begin{aligned} \mathbb{E}[y_i \cdot \mathbb{1}(i \in V)] &= \mathbb{P}[y_i = 1, i \in V] - \mathbb{P}[y_i = -1, i \in V] \\ &= \Phi_{\mu, \sigma^2}(s^* + \sigma\rho) + \Phi_{\mu, \sigma^2}(s^* - \sigma\rho) - 2\Phi_{\mu, \sigma^2}(s^*) \\ &= \frac{1}{2} \left[ \operatorname{erf} \left( \frac{s^* + \sigma\rho - \mu}{\sigma\sqrt{2}} \right) + \operatorname{erf} \left( \frac{s^* - \sigma\rho - \mu}{\sigma\sqrt{2}} \right) \right] - \operatorname{erf} \left( \frac{s^* - \mu}{\sigma\sqrt{2}} \right) \\ &= \frac{1}{2} \left[ \operatorname{erf} \left( \frac{\sigma\rho + s^* - \mu}{\sigma\sqrt{2}} \right) - \operatorname{erf} \left( \frac{\sigma\rho - (s^* - \mu)}{\sigma\sqrt{2}} \right) \right] - \operatorname{erf} \left( \frac{s^* - \mu}{\sigma\sqrt{2}} \right). \end{aligned}$$

135 where the last step uses the fact that  $\operatorname{erf}$  is an odd function. Since  $\operatorname{erf}(x) = \frac{2}{\sqrt{\pi}} \int_0^x e^{-t^2} dt$  and  
 136  $|s^* - \mu| \leq 2.1\sigma$ ,

$$\begin{aligned} \frac{1}{2} \left[ \operatorname{erf} \left( \frac{\sigma\rho + s^* - \mu}{\sigma\sqrt{2}} \right) - \operatorname{erf} \left( \frac{\sigma\rho - (s^* - \mu)}{\sigma\sqrt{2}} \right) \right] &\leq \frac{1}{\sqrt{\pi}} \int_{(\sigma\rho - 2.1\sigma)/\sigma\sqrt{2}}^{(\sigma\rho + 2.1\sigma)/\sigma\sqrt{2}} e^{-t^2} dt \\ &< 3e^{-[(\rho - 2.1)/\sqrt{2}]^2} \\ &\leq 3e^{-\ln(4n)/2} \end{aligned}$$

137 where the second inequality relies on  $e^{-x}$  being monotone decreasing and the last step uses  $n > 20$ ,  
 138 which implies  $\rho - 2.1 \geq \sqrt{\ln(4n)}$ . Then using  $n \geq 3k_2$  we get  $3e^{-\ln(4n)/2} \leq \frac{1}{\sqrt{k_2}}$ , so

$$\left| \mathbb{E}[y_i \cdot \mathbb{1}(i \in V)] - \operatorname{erf} \left( \frac{\mu - s^*}{\sigma\sqrt{2}} \right) \right| \leq \frac{1}{\sqrt{k_2}}. \quad (1)$$

139 Next, as  $|s^* - \mu| \leq 2.1\sigma$ , users having points within  $\sigma\sqrt{2\ln(2\sqrt{n})}$  of  $\mu$  have points within  $\sigma\rho$   
 140 of  $s^*$ . The Gaussian tail bound from Lemma 2.3 then implies  $\mathbb{P}[x \in V^c] \leq 1/\sqrt{n}$ .  $\mathbb{E}[y_i] =$   
 141  $\mathbb{E}[y_i \cdot \mathbb{1}(i \in V)] + \mathbb{E}[y_i \cdot \mathbb{1}(i \in V^c)]$ , and by the above bound on  $\mathbb{P}[x \in V^c]$  and  $|y_i| \leq 1$  we get  
 142  $|\mathbb{E}[y_i \cdot \mathbb{1}(i \in V^c)]| \leq 1/\sqrt{n}$ . Thus

$$|\mathbb{E}[y_i \cdot \mathbb{1}(i \in V)] - \mathbb{E}[y_i]| \leq \frac{1}{\sqrt{n}} < \frac{1}{\sqrt{k_2}}. \quad (2)$$

143 A Chernoff bound on  $\{-1, 1\}$ -valued random variables then tells us that, for  $y = \frac{1}{k_2} \sum_{i \in U_2^{j*}} y_i$ , with  
 144 probability at least  $1 - \beta/2$  we have

$$|y - \mathbb{E}[y_i]| \leq \sqrt{\frac{2\ln(4/\beta)}{k_2}}. \quad (3)$$

145 Combining the three numbered equations above with the triangle inequality yields

$$\left| y - \operatorname{erf} \left( \frac{\mu - s^*}{\sigma\sqrt{2}} \right) \right| < \frac{2 + \sqrt{2\ln(4/\beta)}}{\sqrt{k_2}}.$$

146 Setting  $\bar{\mu} = (\mu - s^*)/\sigma$  and using  $k_2 \geq (100[2 + \sqrt{2\ln(4/\beta)}])^2$ , this rearranges into  $|y| \leq$   
 147  $\operatorname{erf}(\bar{\mu}/\sqrt{2}) + 0.01$ . Since  $\bar{\mu} \in [-2.1, 2.1]$ , we get

$$|y| < \operatorname{erf}(2.1/\sqrt{2}) + 0.01 < 0.98 < \operatorname{erf}(1.7).$$

148 Let  $M$  be an upper bound on the Lipschitz constant for  $\text{erf}^{-1}$  in  $[-0.98, 0.98]$ ,

$$\begin{aligned} M &= \max_{x \in [-0.98, 0.98]} \frac{d\text{erf}^{-1}(x)}{dx} \\ &= \max_{x \in [-0.98, 0.98]} \frac{\sqrt{\pi}}{2} \exp([\text{erf}^{-1}(x)]^2) \\ &\leq \frac{\sqrt{\pi}}{2} \exp([\text{erf}^{-1}(0.98)]^2) < 14. \end{aligned}$$

149 Then for any  $x, y \in [-0.98, 0.98]$  we have  $|\text{erf}^{-1}(x) - \text{erf}^{-1}(y)| \leq M|x - y|$ , so for  $T = \sqrt{2}\text{erf}^{-1}(y)$ ,

$$\begin{aligned} |T - \bar{\mu}| &= |\sqrt{2}(\text{erf}^{-1}(y) - \text{erf}^{-1}(\text{erf}(\bar{\mu}/\sqrt{2})))| \leq 14\sqrt{2}|y - \text{erf}(\bar{\mu}/\sqrt{2})| \\ &< 28 \left( \frac{\sqrt{2} + \sqrt{\ln(4/\beta)}}{k_2} \right). \end{aligned}$$

150 It remains to bound  $|T - \hat{T}|$ , where  $T$  is the (unknown) aggregation of unprivatized  $\{y_i\}$  while  $\hat{T}$  is  
151 the (known) aggregation of privatized  $\{\tilde{y}_i\}$ . By a Chernoff bound analogous to that of Lemma 1.2,  
152 with probability at least  $1 - \beta/2$

$$|T - \hat{T}| \leq \sqrt{2} \left| \text{erf}^{-1}(|y|) - \text{erf}^{-1} \left( |y| + \left\lceil \frac{\varepsilon + 2}{\varepsilon} \right\rceil \sqrt{\frac{2 \ln(4/\beta)}{k_2}} \right) \right|.$$

153 Using  $k_2 > 20000 \left( \frac{\varepsilon + 2}{\varepsilon} \right)^2 \ln(4/\beta)$  (which implies  $\left\lceil \frac{\varepsilon + 2}{\varepsilon} \right\rceil \sqrt{\frac{2 \ln(4/\beta)}{k_2}} \leq 0.01$ ) and the same derivative  
154 trick as above on  $[-0.99, 0.99]$ , we get

$$|T - \hat{T}| \leq 25 \left\lceil \frac{\varepsilon + 2}{\varepsilon} \right\rceil \sqrt{\frac{2 \ln(4/\beta)}{k_2}}.$$

155 Therefore by the triangle inequality

$$|\hat{T} - \bar{\mu}| \leq 28 \left( \frac{\sqrt{2} + \sqrt{\ln(4/\beta)}}{k_2} \right) + 25 \left\lceil \frac{\varepsilon + 2}{\varepsilon} \right\rceil \sqrt{\frac{2 \ln(4/\beta)}{k_2}} = O \left( \frac{1}{\varepsilon} \sqrt{\frac{\log(1/\beta)}{k_2}} \right)$$

156 and by  $\sigma \bar{\mu} = \mu - s^*$  we get

$$|\sigma \hat{T} - \sigma \bar{\mu}| = |(\sigma \hat{T} + s^*) - \mu| = O \left( \frac{\sigma}{\varepsilon} \sqrt{\frac{\log(1/\beta)}{k_2}} \right).$$

157 Thus by taking  $\hat{\mu}_2 = \sigma \hat{T} + s^*$  and substituting in  $k_2 = \Omega(n/\sqrt{\log(n)})$  we get

$$|\hat{\mu}_2 - \mu| = O \left( \frac{\sigma}{\varepsilon} \sqrt{\frac{\log(1/\beta) \sqrt{\log(n)}}{n}} \right).$$

158 □

### 159 3 Proofs from Section 4.1

160 We begin our analysis with a privacy guarantee.

161 **Theorem 3.1.** UVGAUSSTIMATE satisfies  $(\varepsilon, 0)$ -local differentially privacy for  $x_1, \dots, x_n$ .

162 *Proof.* As we already proved that RR1 is private in Section 1, we are left with UVRR2. To prove that  
163 UVRR2 is  $(\varepsilon, 0)$ -locally differentially private as well, we can use a standard Laplace noise privacy  
164 guarantee (see e.g. Theorem 3.6 from Dwork and Roth [6]): given function  $f$  with 1-sensitivity  $\Delta f$ ,  
165 computing  $f(x) + \text{Lap}(\Delta f/\varepsilon)$  satisfies  $(\varepsilon, 0)$ -differential privacy. □

166 First, for each  $j \in \mathcal{L}_1$  and  $i \in U_1^j$ , user  $i$  employs RR1 (see Section 1) to publish a privatized version  
 167 of  $\lfloor x/2^j \rfloor \bmod 4$ . The analyst then constructs two slightly different aggregations of this data. To  
 168 estimate  $\sigma$ , the analyst aggregates responses into  $\hat{H}_1$  via AGG1, which is similar to KVAGG1 up to  
 169 the choice of bins in the constructed histogram  $\hat{H}_1$ . Specifically, bins in  $\hat{H}_1$  are grouped: points with  
 170 value 0 count toward both bin  $(0, 1)$  and bin  $(3, 0)$ , points with value 1 count toward both bin  $(0, 1)$   
 171 and  $(1, 2)$ , and so on.

---

**Algorithm 4** AGG1

---

**Input:**  $\varepsilon, k, \mathcal{L}, U$

```

1: for  $j \in \mathcal{L}$  do
2:   for  $a = 0, 1, 2, 3$  do
3:     Analyst computes  $C^j(a) \leftarrow |\{i \mid i \in U_1^j, \tilde{y}_i = a\}|$ 
4:     Analyst computes  $\hat{H}^j(a) \leftarrow \frac{e^\varepsilon + 3}{e^\varepsilon - 1} \cdot (C^j(a) - \frac{k}{e^\varepsilon + 3})$ 
5:   end for
6:   for  $a = 0, 1, 2, 3$  do
7:     Analyst computes  $\hat{H}_1^j(a) \leftarrow \hat{H}^j(a) + \hat{H}^j(a + 1 \bmod 4)$ 
8:   end for
9: end for
10: Analyst outputs  $\hat{H}_1$ 

```

**Output:** Analyst aggregation  $\hat{H}_1$  of private user estimates

---

172 At a high level, when  $2^j \gg \sigma$ , user responses in group  $U_1^j$  appear concentrated in one element of  
 173  $\{(0, 1), (1, 2), (2, 3), (3, 0)\}$ . This is because user data comes from  $N(\mu, \sigma^2)$ , so if  $2^j \gg \sigma$  then  
 174 most user data falls within  $3\sigma$  of  $\mu$ . Consequently, there exists  $a \in \{0, 1, 2, 3\}$  such that most users  
 175 draw points  $x$  where  $\lfloor x/2^j \rfloor \equiv a$  or  $a + 1 \bmod 4$ , and  $\hat{H}_1^j$  is concentrated around bin  $(a, a + 1 \bmod 4)$ .  
 176 Similarly, if  $2^j \ll \sigma$  then user responses in group  $U_1^j$  appear unconcentrated (for a more precise  
 177 definition of “concentrated”, see below).

178 Examining this transition from concentrated to unconcentrated responses in  $\hat{H}_1^{L_{\max}}, \hat{H}_1^{L_{\max}-1}, \dots$   
 179 yields a rough estimate of when  $2^j \gg \sigma$  versus when  $2^j \ll \sigma$ . By approximating when this change  
 180 occurs, the analyst recovers an approximation of  $\sigma$ . This process is outlined in ESTVAR.

---

**Algorithm 5** ESTVAR

---

**Input:**  $\beta, \varepsilon, \hat{H}_1, k_1, \mathcal{L}_1$

```

1: Analyst computes  $j \leftarrow$  minimum  $j$  such that, for all  $j' \geq j$ ,  $\hat{H}_1^{j'}$  is concentrated
2: if  $j = \emptyset$  then
3:   Analyst outputs  $\hat{\sigma} \leftarrow 2^{L_{\max}}$ 
4: else
5:   Analyst outputs  $\hat{\sigma} \leftarrow 2^j$ 
6: end if

```

**Output:** Analyst estimate  $\hat{\sigma}$  of  $\sigma$

---

181  $\hat{H}_1$  is an estimate of the “true” histogram collection,  $H^j(a) = |\{y_i \mid i \in U_1^j, y_i \in \{a, a + 1 \bmod 4\}\}|$   
 182 for all  $j \in \mathcal{L}_1$ . As in Lemma 1.2, we can show that  $\hat{H}_1$  and  $H_1$  are similar. As the proof is nearly  
 183 identical, we omit it.

184 **Lemma 3.2.** *With probability at least  $1 - \beta$ , for all  $j \in \mathcal{L}_1$ ,*

$$\|\hat{H}_1^j - H_1^j\|_\infty \leq \left(1 + \frac{4}{\varepsilon}\right) \sqrt{2k_1 \ln(8L_1/\beta)}.$$

185 Next, we show how the analyst uses  $\hat{H}_1$  to estimate  $\sigma$  in subroutine ESTVAR. Here, for neatness we  
 186 shorthand

$$\tau = \sqrt{2k_1 \ln(2L_1/\beta)} + \left(1 + \frac{4}{\varepsilon}\right) \sqrt{2k_1 \ln(8L_1/\beta)}$$

187 and use the term *concentrated* to denote any histogram  $\hat{H}_1^j$  such that  $\min_{a \in \{0, 1, 2, 3\}} \hat{H}_1^j(a) \leq 0.03k +$   
 188  $\tau$  and the term *unconcentrated* to denote  $\hat{H}_1^j$  where  $\min_{a \in \{0, 1, 2, 3\}} \hat{H}_1^j(a) \geq 0.04k - \tau$ . As we



show below in Lemma 3.3, when  $2^j \gg \sigma$ ,  $\hat{H}_1^j$  is concentrated. Similarly, when  $2^j \ll \sigma$ ,  $\hat{H}_1^j$  is unconcentrated. This transition enables the analyst to estimate  $\sigma$ .

**Lemma 3.3.** *Conditioned on the success of the preceding lemmas, with probability at least  $1 - \beta$ , ESTVAR outputs  $\hat{\sigma} \in [\sigma, 8\sigma]$ .*

*Proof.* Choose  $j \in \mathcal{L}_1$ . Below, we reason about two (non-exhaustive) possibilities for  $j$ .

**Case 1:**  $2^j \geq 4\sigma$ . Then there exists  $a \in \{0, 1, 2, 3\}$  and interval  $I$  of length  $2^{j+1} \geq 8\sigma$  containing  $[\mu - 2\sigma, \mu + 2\sigma]$  such that for all  $x \in I$ ,  $\lfloor x/2^j \rfloor \bmod 4 \equiv a$  or  $a + 1 \bmod 4$ . By similar application of the Gaussian CDF as in Lemma 1.3, with probability at least  $1 - \beta/2L_1$ ,

$$|\{x_i \mid x_i \in I, i \in U_1^j\}| \geq 0.97k_1 - \sqrt{2k_1 \ln(2L_1/\beta)}.$$

Thus by Lemma 3.2,  $\hat{H}_1^j(a) \geq 0.97k_1 - \tau$ . It follows that  $\hat{H}_1^j(a + 2) \leq 0.03k_1 + \tau$ .  $2^j \geq 4\sigma$  thus implies that histogram  $\hat{H}_1^j$  is concentrated.

**Case 2:**  $2^j \in [\sigma/2, \sigma]$ . Choose  $a \in \{0, 1, 2, 3\}$ . Since  $2^j \in [\sigma/2, \sigma]$  there exist at most three subintervals  $I_1, I_2, I_3 \subset [\mu - 2\sigma, \mu + 2\sigma]$  such that for all  $x \in I = I_1 \cup I_2 \cup I_3$ ,  $\lfloor x/2^j \rfloor \equiv a \bmod 4$ , and  $|I| \geq \sigma$ . Let  $x \sim N(\mu, \sigma^2)$ . Then by a similar application of the Gaussian CDF as in Lemma 1.3, since

$$\mathbb{P}[x \in I] \geq \mathbb{P}[x \in [\mu - 2\sigma, \mu - \sigma)] \geq 0.13$$

with probability  $1 - \beta/8L_1$  at least  $0.13k - \sqrt{2k_1 \ln(8L_1/\beta)}$  users from  $U_1^j$  have points in  $I$ . Since this held for arbitrary  $a$ , a union bound over all four possibilities of  $a$  combined with Lemma 3.2 implies that, with probability at least  $1 - \beta/2L_1$ ,

$$\min_{a \in \{0, 1, 2, 3\}} \hat{H}_1^j(a) \geq 0.13k_1 - \tau.$$

$2^j \leq \sigma \leq 2^{j+1}$  thus implies that histogram  $\hat{H}_1^j$  is uniform.

Union bounding both results over  $j \in \mathcal{L}_1$ , with  $k_1 > 800 \left(2 + \frac{4}{\varepsilon}\right)^2 \ln(8L_1/\beta)$ , with probability  $1 - \beta$  we have  $0.13k - \tau > 0.03k + \tau$  for each  $j \in \mathcal{L}_1$ . Therefore for all  $j \in \mathcal{L}_1$  if  $2^j \geq 4\sigma$  then  $\hat{H}_1^j$  will be concentrated while if  $2^{j+1} \geq \sigma \geq 2^j$  then  $\hat{H}_1^j$  will be unconcentrated.

Let  $j$  be the smallest  $j \in \mathcal{L}_1$  such that  $\hat{H}_1^j$  is concentrated and for all  $j' > j$ ,  $\hat{H}_1^{j'}$  is concentrated as well. If no such  $j$  exists, then we know  $2^{L_{\max}} \geq \sigma \geq 2^{L_{\max}-2}$ , take  $\hat{\sigma} = 2^{L_{\max}}$ , and we get  $\hat{\sigma} \in [\sigma, 4\sigma]$ . If not, then by Case 1 above we know  $2^j \leq 8\sigma$ , and by Case 2 we know  $2^j \geq \sigma$ . Thus taking  $\hat{\sigma} = 2^j$ , we get  $\hat{\sigma} \in [\sigma, 8\sigma]$ .  $\square$

Next, the analyst uses randomized responses from  $U_1$  to compute an initial estimate  $\hat{\mu}_1$  of  $\mu$ . As the process ESTMEAN is identical to that used in KVGaussEstimate up to a different subgroup range  $\mathcal{L}_1$ , we skip its description and only recall its guarantee:

**Lemma 3.4.** *Conditioned on the success of the preceding lemmas, with probability at least  $1 - \beta$ ,  $|\hat{\mu}_1 - \mu| \leq 2\sigma$ .*

From the results above, the analyst obtains an estimate  $\hat{\sigma}$  such that  $\hat{\sigma} \in [\sigma, 8\sigma]$  and an estimate  $\hat{\mu}_1$  such that  $|\hat{\mu}_1 - \mu| \leq 2\sigma$ . The analyst now uses these to compute interval  $I = [\hat{\mu}_1 - \hat{\sigma}(2 + \sqrt{\ln(4n)}), \hat{\mu}_1 + \hat{\sigma}(2 + \sqrt{\ln(4n)})]$ , where  $I$  is intentionally constructed to (with high probability) contain the points of  $\Omega(n)$  users. The analyst then passes  $I$  to users in  $U_2$ . Users in  $U_2$  respond with noisy responses via independent calls to UVRR2. In UVRR2, each user clips their sample  $x_i$  to the interval  $I$  and reports a private version  $\tilde{y}_i$  using Laplace noise scaled to  $|I|$ .

---

#### Algorithm 6 UVRR2

---

**Input:**  $\varepsilon, i, I$

- 1: User  $i$  computes  $x'_i \leftarrow \arg \min_{x \in I} |x - x_i|$
- 2: User  $i$  outputs  $\tilde{y}_i \leftarrow x'_i + \text{Lap}(|I|/\varepsilon)$

**Output:** Private version of user's point clipped to  $I$

---

The average of these  $\tilde{y}_i$  then approximates  $\mu$ . We formalize this in the following lemma, which proves our main result.

227 **Lemma 3.5.** *Conditioned on the success of the previous lemmas, with probability at least  $1 - \beta$ ,*  
 228  $|\hat{\mu}_2 - \mu| = O\left(\frac{\sigma}{\varepsilon} \sqrt{\frac{\log(1/\beta) \log(n)}{n}}\right).$

229 *Proof.* There are two sources of error in the analyst's estimate  $\hat{\mu}_2 = \frac{2}{n} \sum_i \tilde{y}_i$ : error from the unnoised  
 230  $x'_i$ s and error from noise in  $\tilde{y}_i$ s. Specifically, recalling that  $|U_2| = n/2$ , we can decompose  $\hat{\mu}_2$  as

$$\hat{\mu}_2 = \frac{2}{n} \sum_i \tilde{y}_i = \frac{2}{n} \sum_i (x'_i + \eta_i)$$

231 where each  $\eta_i \sim_{i.i.d.} \text{Lap}(|I|/\varepsilon)$  and  $|I| = 2\hat{\sigma}(2 + \sqrt{\ln(4n)})$ .

232 First, using  $n > 4 \ln(3/\beta)$  by concentration of independent Laplace random variables (see e.g. Lemma  
 233 2.8 in Chan et al. [3]) with probability at least  $1 - \beta/3$ ,

$$\left| \frac{2}{n} \sum_i \eta_i \right| \leq \frac{4|I|}{\varepsilon} \sqrt{\frac{2 \ln(3/\beta)}{n}} \leq \frac{8\hat{\sigma}(2 + \sqrt{\ln(4n)})}{\varepsilon} \sqrt{\frac{2 \ln(3/\beta)}{n}} = O\left(\frac{\hat{\sigma}}{\varepsilon} \sqrt{\frac{\log(1/\beta) \log(n)}{n}}\right).$$

234 This bounds the contribution of Laplace noise to overall error.

235 It remains to bound  $|\frac{2}{n} \sum_i x'_i - \mu|$ . Let  $V$  denote the set of users with  $x_i \in I$  and  $V^c$  denote the set of  
 236 users with  $x_i \notin I$ . First, by a Gaussian tail bound, for each user  $i$ ,  $\mathbb{P}[|x_i - \mu| \geq \sigma \sqrt{\ln(4n)}] \leq 1/\sqrt{n}$ .  
 237 Then by a Chernoff bound

$$\mathbb{P}\left[|V^c| > \left(1 + \sqrt{\frac{6 \ln(3/\beta)}{n^{3/2}}}\right) \sqrt{n}\right] \leq \beta/3$$

238 and using  $n \geq (6 \ln(2/\beta))^{2/3}$  we get  $\sqrt{\frac{6 \ln(3/\beta)}{n^{3/2}}} \leq 1$ , so with probability at least  $1 - \beta/3$ ,  $|V^c| \leq 2\sqrt{n}$ .

239 Thus

$$\frac{2}{n} \sum_{i \in V^c} |x'_i - \mu| \leq \frac{2}{n} (|V^c| \cdot |I|) \leq \frac{6\hat{\sigma}(2 + \sqrt{\ln(4n)})}{\sqrt{n}} = O\left(\frac{\hat{\sigma} \sqrt{\log(n)}}{\sqrt{n}}\right).$$

240 This bounds the contribution of error from the (unprivatized) data of users in  $V^c$ . Let  $V$  denote the  
 241 set of users in  $U_2$  with points in  $I$ . We bound the error contributed by users in  $V$  in a similar way.  
 242 Users in  $V$  have  $x'_i = x_i$ , so by a Chernoff bound on (shifted)  $[0, |I|]$ -bounded random variables, with  
 243 probability at least  $1 - \beta/3$

$$\frac{2}{n} \sum_{i \in V^c} |x'_i - \mu| = \frac{2}{n} \sum_{i \in V^c} |x_i - \mu| \leq |I| \sqrt{\frac{2 \ln(6/\beta)}{n}} \leq \hat{\sigma}(2 + \sqrt{\ln(4n)}) \sqrt{\frac{2 \ln(6/\beta)}{n}} = O\left(\frac{\hat{\sigma} \sqrt{\log(1/\beta) \log(n)}}{\sqrt{n}}\right).$$

244 Putting these three bounds together, we get

$$\begin{aligned} \left| \frac{2}{n} \sum_i \tilde{y}_i - \mu \right| &\leq \frac{2}{n} \sum_i |x'_i + \eta_i - \mu| \\ &\leq \frac{2}{n} \sum_i |x'_i - \mu| + \frac{2}{n} \sum_i |\eta_i| \\ &= \frac{2}{n} \sum_{i \in V} |x'_i - \mu| + \frac{2}{n} \sum_{i \in V^c} |x'_i - \mu| + \frac{2}{n} \sum_i |\eta_i| \\ &= O\left(\frac{\sigma}{\varepsilon} \sqrt{\frac{\log(n) \log(1/\beta)}{n}}\right) \end{aligned}$$

245 where the last step uses  $\hat{\sigma} \in [\sigma, 8\sigma]$  from Lemma 3.3. □

## 246 4 Proofs from Section 4.2

247 We start with pseudocode for 1ROUNDUVGAUSSTIMATE.

---

**Algorithm 7** 1ROUNDUVGAUSSTIMATE

---

**Input:**  $\varepsilon, k_1, k_2, \mathcal{L}_1, n, R, \sigma, U_1, U_2,$ 

```
1: Analyst computes  $\rho \leftarrow \lceil \sqrt{2 \ln(2\sqrt{n})} + 6 \rceil$ 
2: for  $j \in \mathcal{L}_1$  do
3:   for user  $i \in U_1^j$  do
4:     User  $i$  outputs  $\tilde{y}_i \leftarrow \text{RR1}(\varepsilon, i, j)$ 
5:   end for
6: end for
7: for  $j_1 \in \mathcal{L}_1$  do
8:   for  $j_2 \in R_{j_1}$  do
9:     for user  $i \in U_2^{j_1, j_2}$  do
10:      User  $i$  outputs  $\tilde{y}_i \leftarrow \text{1ROUNDUVRR2}(\varepsilon, i, j_1, j_2, \rho, S)$ 
11:    end for
12:  end for
13: end for
14: Analyst computes  $\hat{H}_1 \leftarrow \text{AGG1}(\varepsilon, k_1, \mathcal{L}_1, U_1)$ 
15: Analyst computes  $\hat{\sigma} \leftarrow \text{ESTVAR}(\beta, \varepsilon, \hat{H}_1, k_1, \mathcal{L})$ 
16: Analyst computes  $\hat{j}_1 \leftarrow \log(\hat{\sigma})$ 
17: Analyst computes  $\hat{H}_2 \leftarrow \text{KVAGG1}(\varepsilon, k_1, \mathcal{L}_1, U_1)$ 
18: Analyst computes  $\hat{\mu}_1 \leftarrow \text{ESTMEAN}(\beta, \varepsilon, \hat{H}_2, k_1, \mathcal{L}_1)$ 
19: Analyst computes  $\hat{j}_2 \leftarrow \arg \min_{j \in R_{j_1}} (\min_{s \in S(j_1, j)} |s - \hat{\mu}_1|)$ 
20: Analyst computes  $s^* \leftarrow \min_{s \in S(j_1, j_2)} |s - \hat{\mu}_1|$ 
21: Analyst outputs  $\hat{\mu}_2 \leftarrow s^* + \frac{1}{k_2} \sum_{i \in U_2^{j_1, j_2}} \tilde{y}_i$ 
```

**Output:** Analyst estimate  $\hat{\mu}_2$  of  $\mu$ 

---

▷ End of round 1

248 1ROUNDUVGAUSSTIMATE's privacy guarantee follows from the same analysis of randomized  
249 response and Laplace noise as for UVGAUSSTIMATE, so we omit its proof.

250 **Theorem 4.1.** 1ROUNDUVGAUSSTIMATE satisfies  $(\varepsilon, 0)$ -local differentially privacy for  $x_1, \dots, x_n$ .

251 We define  $k_1, \mathcal{L}_1$ , and  $U_1$ , as in UVGAUSSTIMATE and skip the analysis of 1ROUNDUVGAUSSTI-  
252 MATE's treatment of users in  $U_1$  as it is identical to that of UVGAUSSTIMATE. We recall its collected  
253 guarantee:

254 **Lemma 4.2.** With probability at least  $1 - \beta$ ,  $\hat{\sigma} \in [\sigma, 8\sigma]$  and  $|\hat{\mu}_1 - \mu| \leq 2\sigma$ .

255 We again define  $R$  and  $S$  for  $U_2$ , albeit with a few modifications. First, we let  $\rho = \lceil \sqrt{\ln(4n)} + 6 \rceil$   
256 for neatness. Then, recalling from Section 3 that  $\mathcal{L}_1$  ranges over possible values of  $\log(\sigma)$ , for  
257 each  $j_a \in \mathcal{L}_1$  we define  $R_{j_a} = \{2^{j_a}, 2 \cdot 2^{j_a}, \dots, \rho \cdot 2^{j_a}\}$ . Next, for each  $j_a \in \mathcal{L}_1$  and  $j_b \in R_{j_a}$ , we  
258 define  $S(j_a, j_b) = \{j_b + b\rho 2^{j_a} \mid b \in \mathbb{Z}\}$ . Finally, we split  $U_2$  into  $L_1 \cdot \rho$  subgroups  $U_2^{j_a, j_b}$  of size

259  $k_2 = \Omega\left(\frac{n}{\log\left(\frac{\sigma_{\max}}{\sigma_{\min}} + 1\right)\sqrt{\log(n)}}\right)$  for each  $j_a \in \mathcal{L}_1$  and  $j_b \in R_{j_a}$ . As in 1ROUNDKVGAUSSTIMATE, we  
260 parallelize over these subgroups to simulate the second round of UVGAUSSTIMATE for different  
261 values of  $(j_a, j_b)$ .

262 In each subgroup  $U_2^{j_a, j_b}$ , each user  $i$  computes the nearest element  $s_i \in S(j_a, j_b)$  to  $x_i$ ,  $s_i =$   
263  $\arg \min_{s \in S(j_a, j_b)} |x_i - s|$  and outputs  $x_i - s_i$  plus Laplace noise in 1ROUNDUVRR2. The analyst then  
264 uses estimates  $\hat{j}_1 = \lceil \log(\hat{\sigma}) \rceil$  and  $\hat{\mu}_1$  from  $U_1$  to compute  $j_2 = \arg \min_{j \in R_{j_1}} (\min_{z \in S(j_1, j)} |z - \hat{\mu}_1|)$ .  
265 Finally, the analyst aggregates randomized responses from group  $U_2^{j_1, \hat{\mu}_2}$  into an estimate  $\hat{\mu}_2$ .

---

**Algorithm 8** 1ROUNDUVRR2

---

**Input:**  $\varepsilon, i, j_1, j_2, \rho, S$ 

```
1: User  $i$  computes  $s_i \leftarrow \min_{s \in S(j_1, j_2)} |s - x_i|$ 
2: User  $i$  computes  $y_i \leftarrow x_i - s_i$ 
3: User  $i$  outputs  $\tilde{y}_i \leftarrow y_i + \text{Lap}(2\rho 2^{j_1}/\varepsilon)$ 
```

**Output:** Private version of user's point  $x_i$ 

---

266 As in 1ROUNDKVGGAUSSTIMATE, we start with a concentration result for each  $U_2^{j_1, j_2}$ . Since its  
267 proof is similar to that of Lemma 2.3, we omit it.

268 **Lemma 4.3.** *With probability at least  $1 - \beta$ , for all  $j_1 \in \mathcal{L}_1$  and  $j_2 \in R_{j_1}$ , group  $U_2^{j_1, j_2}$  contains  
269  $\leq 2\sqrt{k_2}$  users  $i$  such that  $|x_i - \mu| > \sigma\sqrt{\ln(4n)}$ .*

270 In combination with the previous lemmas, this enables us to prove our final accuracy result.

271 **Lemma 4.4.** *Conditioned on the success of the previous lemmas, with probability at least  $1 - \beta$ ,  
272 1ROUNDUVGAUSSTIMATE outputs  $\hat{\mu}_2$  such that*

$$|\hat{\mu}_2 - \mu| = O\left(\frac{\sigma}{\varepsilon} \sqrt{\frac{\log\left(\frac{\sigma_{\max}}{\sigma_{\min}} + 1\right) \log(1/\beta) \log^{3/2}(n)}{n}}\right).$$

273 *Proof.* By Lemma 4.2,  $\hat{\sigma} \in [\sigma, 8\sigma]$  and  $|\hat{\mu}_1 - \mu| \leq 2\sigma$ . Since  $j_1 = \log(\hat{\sigma}) \in \mathcal{L}_1$  and  
274  $j_2 = \arg \min_{j \in R_{j_1}} (\min_{s \in S(j_1, j)} |s - \hat{\mu}_1|)$ , by the definition of  $s^* \in S(j_1, j_2)$ ,  $|s^* - \hat{\mu}_1| \leq 0.5\hat{\sigma} < 4\sigma$ .  
275 Thus  $|s^* - \mu| < 6\sigma$ .

276 Consider group  $U_2^{j_1, j_2}$ . By Lemma 4.3 at most  $2\sqrt{k_2}$  users  $i \in U_2^{j_1, j_2}$  have  $|x_i - \mu| > \sigma\sqrt{\ln(4n)}$ .  
277 Thus by  $|s^* - \mu| < 6\sigma$  and the fact that any two points in  $S(j_1, j_2)$  are at least  $\hat{\sigma}\rho \geq \sigma(6 + \sqrt{\ln(4n)})$   
278 far apart, we get that at least  $k_2 - 2\sqrt{k_2}$  users  $i \in U_2^{j_1, j_2}$  set  $s_i = s^*$  in their run of 1ROUNDUVRR2.  
279 Denote this subset of users by  $V$ , and denote by  $V^c$  the set of users  $i \in U_2^{j_1, j_2}$  such that  $s_i \neq s^*$ , and  
280 for each user  $i \in U_2$  let  $y_i = x_i - s_i$ .

281 Let  $f(x) = \frac{1}{\sigma\sqrt{2\pi}} \exp(-(x - \mu)^2/2\sigma^2)$ , the density for  $N(\mu, \sigma^2)$ . Then

$$\int_{-\infty}^{\infty} (x - \mu) f(x) dx = \int_{-\infty}^{s^* - \rho\hat{\sigma}} (x - \mu) f(x) dx + \int_{s^* - \rho\hat{\sigma}}^{s^* + \rho\hat{\sigma}} (x - \mu) f(x) dx + \int_{s^* + \rho\hat{\sigma}}^{\infty} (x - \mu) f(x) dx. \quad (4)$$

282 Let  $g(x) = -\frac{\sigma}{\sqrt{2\pi}} \exp(-(x - \mu)^2/2\sigma^2)$ , the antiderivative of  $(x - \mu)f(x)$ . Then

$$\begin{aligned} \left| \int_{-\infty}^{s^* - \rho\hat{\sigma}} (x - \mu) f(x) dx \right| &= \left| g(s^* - \rho\hat{\sigma}) - \lim_{b \rightarrow -\infty} g(b) \right| \\ &= \left| \frac{\sigma}{\sqrt{2\pi}} \cdot \exp\left(-\frac{(s^* - \rho\hat{\sigma} - \mu)^2}{2\sigma^2}\right) \right| \\ &\leq \left| \frac{\sigma}{\sqrt{2\pi}} \cdot \exp\left(-\frac{([6 - \rho]\sigma)^2}{2\sigma^2}\right) \right| \\ &\leq \left| \frac{\sigma}{\sqrt{2\pi}} \cdot \exp\left(-\frac{[6 - \rho]^2}{2}\right) \right| \\ &< \frac{\sigma}{\sqrt{2\pi}} \cdot \exp(-\ln(2\sqrt{n})) \\ &< \frac{\sigma}{\sqrt{n}} \end{aligned}$$

283 where the first inequality uses  $\hat{\sigma} \geq \sigma$  and  $|s^* - \mu| < 6\sigma$ . Similar logic implies

284  $\left| \int_{s^* + \rho\hat{\sigma}}^{\infty} (x - \mu) f(x) dx \right| \leq \sigma/\sqrt{n}$  as well. Therefore by Equation 4 and  $\int_{-\infty}^{\infty} (x - \mu) f(x) dx = 0$ ,

$$\left| \int_{s^* - \rho\hat{\sigma}}^{s^* + \rho\hat{\sigma}} (x - \mu) f(x) dx \right| \leq 2\sigma/\sqrt{n}$$

285 so by  $\mathbb{E}[x_i \cdot \mathbf{1}(i \in V)] = \int_{s^* - \rho\hat{\sigma}}^{s^* + \rho\hat{\sigma}} x f(x) dx$ , we get

$$\left| \mathbb{E}[x_i \cdot \mathbf{1}(i \in V)] - \mu \int_{s^* - \rho\hat{\sigma}}^{s^* + \rho\hat{\sigma}} f(x) dx \right| \leq 2\sigma/\sqrt{n}.$$

286 Since  $\mathbb{E}[x_i \cdot \mathbf{1}(i \in V)] / \mathbb{P}[i \in V] = \mathbb{E}[x_i \mid i \in V]$  and  $\mathbb{P}[i \in V] = \int_{s^* - \rho\hat{\sigma}}^{s^* + \rho\hat{\sigma}} f(x) dx$ , this means

$$|\mathbb{E}[x_i \mid i \in V] - \mu| \leq 2\sigma/\sqrt{n}.$$

287 By  $y_i = x_i - s^*$  for  $i \in V$ ,

$$|\mathbb{E}[y_i \mid i \in V] - (\mu - s^*)| \leq 2\sigma/\sqrt{n}.$$

288 We can therefore decompose

$$\begin{aligned} \left| \frac{1}{k_2} \sum_{i \in U_2^{j_1, j_2}} y_i - (\mu - s^*) \right| &\leq \left| \frac{1}{k_2} \sum_{i \in V} (y_i - (\mu - s^*)) \right| + \left| \frac{1}{k_2} \sum_{i \in V^c} (y_i - (\mu - s^*)) \right| \\ &\leq \left[ \frac{2\sigma}{\sqrt{n}} + \rho\hat{\sigma} \sqrt{\frac{2 \log(4/\beta)}{k_2}} \right] + \frac{2\rho\hat{\sigma}}{\sqrt{k_2}} \\ &= O\left( \sigma \sqrt{\frac{\log(1/\beta) \log(n)}{k_2}} \right) \end{aligned}$$

289 where the first inequality uses a (with probability at least  $1 - \beta/2$ ) Chernoff bound on  $\{y_i \mid i \in V\}$   
 290 concentrating around  $\mathbb{E}[y_i \mid i \in V]$  as well as  $|V^c| \leq 2\sqrt{k_2}$ , and the last step uses  $\hat{\sigma} \in [\sigma, 8\sigma]$ .

291 Next, since we can decompose

$$\frac{1}{k_2} \sum_{i \in U_2^{j_1, j_2}} \tilde{y}_i = \frac{1}{k_2} \sum_{i \in U_2^{j_1, j_2}} y_i + \frac{1}{k_2} \sum_{i \in U_2^{j_1, j_2}} \eta_i$$

292 where each  $\eta_i \sim \text{Lap}(\rho\hat{\sigma}/\varepsilon)$ , the same concentration of Laplace noise from Lemma 3.5 says that with  
 293 probability  $1 - \beta/2$ ,

$$\left| \frac{1}{k_2} \sum_{i=1}^{k_2} \eta_i \right| = O\left( \frac{\rho\hat{\sigma}}{\varepsilon} \sqrt{\frac{\log(1/\beta)}{k_2}} \right) = O\left( \frac{\sigma}{\varepsilon} \sqrt{\frac{\log(1/\beta) \log(n)}{k_2}} \right).$$

294 Combining with the bound above and substituting in  $k_2 = \Omega\left( \frac{n}{\log(\frac{\sigma_{\max}}{\sigma_{\min}} + 1) \sqrt{\log(n)}} \right)$ ,

$$\left| \frac{1}{k_2} \sum_{i \in U_2^{j_1, j_2}} \tilde{y}_i - (\mu - s^*) \right| = O\left( \frac{\sigma}{\varepsilon} \sqrt{\frac{\log\left(\frac{\sigma_{\max}}{\sigma_{\min}} + 1\right) \log(1/\beta) \log^{3/2}(n)}{n}} \right).$$

295 The claim then follows from  $\hat{\mu}_2 = s^* + \frac{1}{k_2} \sum_{i \in U_2^{j_1, j_2}} \tilde{y}_i$ . □

## 296 5 Proofs from Section 5

297 For completeness, we start with the formal notion of sequential interactivity used by Duchi et al. [5],  
 298 which requires that the set of messages  $\{Y_i\}$  sent by the users satisfies the following conditional  
 299 independence structure:  $\{X_i, Y_1, \dots, Y_{i-1}\} \rightarrow Y_i$  and  $Y_i \perp X_j \mid \{X_i, Y_1, \dots, Y_{i-1}\}$  for  $j \neq i$ . Our  
 300 notion of sequential interactivity — where each user only sends one message — is a specific case of  
 301 this general definition. Our upper bounds all meet this specific requirement, while our lower bound  
 302 meets the general one.

303 We start by defining an instance  $\text{Estimate}(n, M, \sigma)$ . Here, a protocol receives  $n$  samples from a  
 304  $N(\mu, \sigma^2)$  distribution where  $\sigma$  is known,  $\mu \in [0, M]$ , and the goal is to estimate  $\mu$ . Next, define  
 305 uniform random variable  $V \sim_U \{0, 1\}$ . Consider the following testing problem: for  $V = v$ , if  $v = 0$ ,  
 306 then each user  $i$  draws a sample  $x_i \sim_{iid} N(0, \sigma^2)$ , while if  $v = 1$  then each user  $i$  draws a sample  
 307  $x_i \sim_{iid} N(M, \sigma^2)$ . The problem  $\text{Test}(n, M, \sigma)$  is to recover  $v$  from  $x_1, \dots, x_n$ . We say protocol  
 308  $\mathcal{A}(\alpha, \beta)$ -solves  $\text{Estimate}(n, M, \sigma)$  if, with probability at least  $1 - \beta$ ,  $\mathcal{A}(\text{Estimate}(n, M, \sigma)) = \hat{\mu}$   
 309 such that  $|\hat{\mu} - \mu| < \alpha$ . We will say that an algorithm  $\mathcal{A}$   $\beta$ -solves  $\text{Test}(n, M, \sigma)$  if, with probability at  
 310 least  $1 - \beta$ ,  $\mathcal{A}(\text{Test}(n, M, \sigma)) = v$ . Formally,  $\text{Test}(n, M, \sigma)$  is no harder than  $\text{Estimate}(n, M, \sigma)$ .

311 **Lemma 5.1.** *If there exists a sequentially interactive and  $(\varepsilon, \delta)$ -locally private protocol  $\mathcal{A}$  that*  
 312  *$(M/2, \beta)$ -solves  $\text{Estimate}(n, M, \sigma)$ , then there exists a sequentially interactive and  $(\varepsilon, \delta)$ -locally*  
 313 *private protocol  $\mathcal{A}'$  that  $\beta$ -solves  $\text{Test}(n, M, \sigma)$ .*

314 *Proof.* Let  $x_1, \dots, x_n$  be the samples from an instance of  $\text{Test}(n, M, \sigma)$ . We define  $\mathcal{A}'$  to run  
 315  $\mathcal{A}(x_1, \dots, x_n)$  and then output  $\arg \min_{\hat{\mu} \in \{0, M\}} |\mathcal{A}(x_1, \dots, x_n) - \hat{\mu}|$ . Since  $\mathcal{A}$   $(M/2, \beta)$ -solves  
 316  $\text{Estimate}(n, M, \sigma)$ , with probability at least  $1 - \beta$ ,  $|\mathcal{A}(x_1, \dots, x_n) - \mu| < M/2$ . Thus with probability  
 317 at least  $1 - \beta$ ,  $\mathcal{A}'(x_1, \dots, x_n) = v$ . Thus  $\mathcal{A}'$   $\beta$ -solves  $\text{Test}(n, M, \sigma)$ . As  $\mathcal{A}'$  interacted with  $x_1, \dots, x_n$   
 318 only through  $(\varepsilon, \delta)$ -locally private  $\mathcal{A}$ , by preservation of differential privacy under postprocessing,  
 319  $\mathcal{A}'$  is  $(\varepsilon, \delta)$ -locally private as well. Similar logic implies that  $\mathcal{A}'$  is also sequentially interactive.  $\square$

320 We now extend this result to  $(\varepsilon, \delta)$ -locally private protocols using results from both Bun et al. [2]  
 321 and Cheu et al. [4]<sup>1</sup>.

322 **Lemma 5.2.** *Let  $\delta < \min\left(\frac{\varepsilon\beta}{48n \ln(2n/\beta)}, \frac{\beta}{16n \ln(n/\beta)e^{\tau\varepsilon}}\right)$ ,  $\varepsilon > 0$ , and suppose that  $\mathcal{A}$  is a sequentially*  
 323 *interactive and  $(\varepsilon, \delta)$ -locally private protocol. If  $\mathcal{A}$   $\beta$ -solves  $\text{Test}(n, M, \sigma)$ , then there exists a*  
 324 *sequentially interactive  $(10\varepsilon, 0)$ -locally private  $\mathcal{A}'$  that  $4\beta$ -solves  $\text{Test}(n, M, \sigma)$ .*

325 *Proof.* Our analysis splits into two cases depending on  $\varepsilon$ .

326 **Case 1:**  $\varepsilon \leq 1/4$ . In this case, we use a result from Bun et al. [2], included here for completeness.

327 **Fact 5.3** (Theorem 6.1 in Bun et al. [2] (restated)). *Given  $\varepsilon \leq 1/4$  and  $\delta < \varepsilon\beta/48n \ln(2n/\beta)$ ,*  
 328 *there exists a  $(10\varepsilon, 0)$ -locally private algorithm  $\mathcal{A}'$  such that for every database  $U = \{x_1, \dots, x_n\}$ ,*  
 329  *$d_{TV}(\mathcal{A}(U), \mathcal{A}'(U)) \leq \beta$ , where  $d_{TV}$  denotes total variation distance.*

330 Thus, denoting by  $E_{\mathcal{A}}$  the event where  $\mathcal{A}$  recovers the correct  $v$  on  $\text{Test}(n, M, \sigma)$  and  $E_{\mathcal{A}'}$  the event  
 331 where  $\mathcal{A}'$  recovers the correct  $v$  on  $\text{Test}(n, M, \sigma)$ ,  $|\mathbb{P}[E_{\mathcal{A}}] - \mathbb{P}[E_{\mathcal{A}'}]| \leq \beta$ , where the probabilities  
 332 are respectively over  $\mathcal{A}$  and  $\mathcal{A}'$ . Thus since  $\mathcal{A}$   $\beta$ -solves  $\text{Test}(n, M, \sigma)$ , it follows that  $\mathcal{A}'$   $2\beta$ -solves  
 333 (and thus also  $4\beta$ -solves)  $\text{Test}(n, M, \sigma)$ .

334 **Case 2:**  $\varepsilon > 1/4$ . In this case we use a result from Cheu et al. [4]<sup>2</sup>

335 **Fact 5.4** (Theorem A.1 in Cheu et al. [4] (restated)). *Given  $\varepsilon > 1/4$  and  $\delta < \frac{\beta}{16n \ln(n/\beta)e^{\tau\varepsilon}}$ , there*  
 336 *exists an  $(8\varepsilon, 0)$ -locally private protocol  $\mathcal{A}'$  such that  $\mathcal{A}'$   $4\beta$ -solves  $\text{Test}(n, M, \sigma)$ .*

337  $\square$

338 Finally, we prove that  $\text{Test}$  is hard for  $(\varepsilon, 0)$ -locally private protocols. At a high level, we prove  
 339 this result by viewing  $\text{Test}$  as a Markov chain  $V \rightarrow X \rightarrow Y \rightarrow Z$ , where  $V$  is the random variable selecting  $v$ ,  
 340  $X = (x_1, \dots, x_n)$  is the random variable for users' i.i.d. samples,  $Y = (y_1, \dots, y_n)$  is the random  
 341 variable for users'  $(\varepsilon, 0)$ -privatized responses, and  $Z = \mathcal{A}(\text{Test}(n, M, \sigma))$ . As  $V \rightarrow X \rightarrow Y \rightarrow Z$   
 342 is a Markov chain (i.e., any two random variables in the chain are conditionally independent given  
 343 a random variable between them). We further bound  $I(X; Y)$  using  
 344 existing tools from the privacy literature [5]. The resulting upper bound on  $I(V; Z)$  enables us to  
 lower bound the probability of an incorrect answer  $Z$ .

345 **Lemma 5.5.** *Suppose  $M \leq \sigma/[4(e^\varepsilon - 1)\sqrt{2nc}]$ , where  $c$  is an absolute constant. For any sequentially*  
 346 *interactive and  $(\varepsilon, 0)$ -locally private protocol  $\mathcal{A}$  that  $\beta$ -solves  $\text{Test}(n, M, \sigma)$ ,  $\beta \geq 1/4$ .*

347 *Proof.* We may express any sequentially interactive  $(\varepsilon, 0)$ -locally private protocol  $\mathcal{A}$  that  $\beta$ -solves  
 348  $\text{Test}(n, M, \sigma)$  as a Markov chain  $V \rightarrow X \rightarrow Y \rightarrow Z$ , where  $V$  is the random variable selecting  $v$ ,  
 349  $X = (x_1, \dots, x_n)$  is the random variable for users' i.i.d. samples,  $Y = (y_1, \dots, y_n)$  is the random  
 350 variable for users'  $(\varepsilon, 0)$ -privatized responses, and  $Z = \mathcal{A}(\text{Test}(n, M, \sigma))$ . As  $V \rightarrow X \rightarrow Y \rightarrow Z$   
 351 is a Markov chain (i.e., any two random variables in the chain are conditionally independent given  
 352 a random variable between them). Thus by a strong data processing inequality for two Gaussians  
 353 (see e.g. Section 4.1 in Braverman et al. [1] or, for a broader treatment of strong data processing  
 354 inequalities, Raginsky [8]), there exists absolute constant  $c$  such that for each user  $i$ ,  $I(V; Y_i) \leq$

<sup>1</sup>Both of these results are stated for noninteractive protocols, it is straightforward to see that their techniques carry over to sequentially interactive protocols. This is because both results rely on transforming a single user call to an  $(\varepsilon, \delta)$ -local randomizer into calls to an  $(O(\varepsilon), 0)$ -local randomizer. Since users in sequentially interactive protocols still only make a single call to a local randomizer, we can apply the same transformations to each single user call and obtain an  $(O(\varepsilon), 0)$ -locally private sequentially interactive protocol.

<sup>2</sup>Cheu et al. [4] originally state their result for  $\varepsilon > 2/3$ , but mildly strengthening their assumed upper bound on  $\delta$  from  $\delta < \frac{\beta}{8n \ln(n/\beta)e^{6\varepsilon}}$  to  $\delta < \frac{\beta}{16n \ln(n/\beta)e^{\tau\varepsilon}}$  yields the result here.

355  $\frac{cM^2}{\sigma^2} I(X_i; Y_i)$ , where  $I(A; B)$  denotes the mutual information between random variables  $A$  and  $B$ .  
 356 Next, since our protocol is  $(\varepsilon, 0)$ -locally private, by Corollary 1 from Duchi et al. [5], for each user  $i$ ,  
 357  $I(X_i; Y_i) \leq 4(e^\varepsilon - 1)^2$ . With the equation above, we get

$$I(V; Y_i) \leq \frac{4cM^2(e^\varepsilon - 1)^2}{\sigma^2}. \quad (5)$$

358 Without loss of generality, suppose  $Z$  is a deterministic function of  $Y$  (if  $Z$  is a random function of  $Y$   
 359 then it decomposes into a convex combination of deterministic functions of  $Y$ ). From Markov chain  
 360  $V \rightarrow X \rightarrow Y \rightarrow Z$  and the (generic) data processing inequality we get

$$\begin{aligned} I(V; Z) &\leq I(V; Y_1, \dots, Y_n) \\ &= \sum_{i=1}^n I(V; Y_i \mid Y_{i-1}, \dots, Y_1) \\ &\leq \sum_{i=1}^n I(V, Y_{i-1}, \dots, Y_1; Y_i) \\ &= \sum_{i=1}^n [I(V; Y_i) + I(Y_{i-1}, \dots, Y_1; Y_i \mid V)] \\ &= \sum_{i=1}^n I(V; Y_i) \end{aligned}$$

361 where the last step follows from the independence of  $Y_i$  and  $Y_1, \dots, Y_{i-1}$  given  $V$ . Substituting in  
 362 Equation 5,  $I(V; Z) \leq \frac{4ncM^2(e^\varepsilon - 1)^2}{\sigma^2}$ . Therefore by  $M \leq \sigma/4(e^\varepsilon - 1)\sqrt{2nc}$  we get  $I(V; Z) \leq 1/8$ .

363 Define  $P$  to be the distribution of  $Z$  (over the randomness of  $V$ ,  $X$ , and  $Y$ ), and let  $P_0$  and  $P_1$  be the  
 364 distributions for  $Z \mid V = 0$  and  $Z \mid V = 1$  respectively. Then as  $V$  is uniform,  $P = (P_0 + P_1)/2$ , so

$$\|P - P_0\|_1 = \|P - P_1\|_1 = \frac{1}{2}\|P_0 - P_1\|_1.$$

365 Moreover, by

$$\begin{aligned} \mathbb{P}[Z = V] &= \mathbb{P}[Z = 0, V = 0] + \mathbb{P}[Z = 1, V = 1] \\ &= \frac{1}{2}(P_0(0) + [1 - P_1(0)]) \\ &\leq \frac{1}{2}(1 + |P_0(0) - P_1(0)|) \\ &= \frac{1}{2} + \frac{1}{4}\|P_0 - P_1\|_1 \end{aligned}$$

366 we get  $\mathbb{P}[Z = V] \leq \frac{1}{2} + \frac{1}{4}\|P_0 - P_1\|_1$ . Thus

$$\begin{aligned} \frac{\|P_0 - P_1\|_1^2}{8} &= \frac{1}{4}(\|P_0 - P\|_1^2 + \|P_1 - P\|_1^2) \\ &\leq \frac{1}{2}(D_{KL}(P_0 \parallel P) + D_{KL}(P_1 \parallel P)) \\ &= I(Z; V) \leq 1/8 \end{aligned}$$

367 where the second-to-last inequality uses Pinsker's inequality. It follows that  $\|P_0 - P_1\|_1 \leq 1$ . Substi-  
 368 tuting this into  $\mathbb{P}[Z = V] \leq \frac{1}{2} + \frac{1}{4}\|P_0 - P_1\|_1$ , we get  $\mathbb{P}[Z = V] \leq \frac{3}{4}$ .  $\square$

369 We combine the preceding results to prove a general lower bound for Estimate as follows: for  
 370 appropriate  $\varepsilon$  and  $\delta$ , by Lemma 5.1 any sequentially interactive and  $(\frac{\varepsilon}{10}, \delta)$ -locally private protocol  
 371  $\mathcal{A}$  that  $(M/2, \frac{\beta}{4})$ -solves Estimate  $(n, M, \sigma)$  implies the existence of a sequentially interactive and  
 372  $(\frac{\varepsilon}{10}, \delta)$ -locally private protocol  $\mathcal{A}'$  that  $\frac{\beta}{4}$ -solves Test  $(n, M, \sigma)$ . Then, Lemma 5.2 implies the existence  
 373 of a sequentially interactive and  $(\varepsilon, 0)$ -locally private protocol  $\mathcal{A}''$  that  $\beta$ -solves Test  $(n, M, \sigma)$ .  
 374 By Lemma 5.5 any such  $\mathcal{A}'$  that  $\beta$ -solves Test  $(n, M, \sigma)$  has  $\beta \geq 1/4$ . Hardness for Test therefore  
 375 implies hardness for Estimate. We condense this reasoning into the following theorem.

**Theorem 5.6.** Let  $\delta < \min\left(\frac{\epsilon\beta}{60n \ln(5n/2\beta)}, \frac{\beta}{16n \ln(n/\beta)e^{\tau\epsilon}}\right)$ ,  $\epsilon > 0$ , and let  $\mathcal{A}$  be a sequentially interactive  $(\epsilon, \delta)$ -locally private  $(\alpha, \beta)$ -estimator for Estimate  $(n, M, \sigma)$  where  $M = \sigma/[4(e^\epsilon - 1)\sqrt{2nc}]$ ,  $c$  is as in Lemma 5.5, and  $\beta < 1/16$ . Then  $\alpha \geq M/2 = \Omega\left(\frac{\sigma}{\epsilon}\sqrt{\frac{1}{n}}\right)$ .

In particular, Theorem 5.6 implies that our upper bounds are tight up to logarithmic factors for any sequentially interactive and  $(\epsilon, \delta)$ -locally private protocol with sufficiently small  $\delta$ . Using recent subsequent work [7], we can also extend this result to the fully interactive setting, as shown in the next section.

## 5.1 Extension to Fully Interactive Lower Bound

The following result, proven in subsequent work by Joseph et al. [7] also relying on the work of Braverman et al. [1], gives a general lower bound for locally private simple hypothesis testing problems like Test.

**Lemma 5.7** (Theorem 5.3 in Joseph et al. [7]). For  $\epsilon > 0$  and  $\delta < \min\left(\frac{\epsilon^3\alpha^2}{48n \ln(2n/\beta)}, \frac{\epsilon^2\alpha^2}{64n \ln(n/\beta)e^{\tau\epsilon}}\right)$ , any  $(\epsilon, \delta)$ -locally private simple hypothesis testing protocol distinguishing between distributions  $P_0$  and  $P_1$  with probability at least  $2/3$  requires  $n = \Omega\left(\frac{1}{\epsilon^2\|P_0 - P_1\|_{TV}^2}\right)$  samples.

Since in general  $D_{KL}(N(\mu_1, \sigma^2) \| N(\mu_2, \sigma^2)) \leq \left[\frac{\mu_1 - \mu_2}{\sigma}\right]^2$ , in the setting of Test  $(n, M, \sigma)$  we are distinguishing between  $P_0 = N(0, \sigma^2)$  and  $P_1 = N(M, \sigma^2)$  and get  $D_{KL}(P_0 \| P_1) = O\left(\frac{M^2}{\sigma^2}\right)$ . Pinsker's inequality then implies  $\|P_0 - P_1\|_{TV}^2 = O\left(\frac{M^2}{\sigma^2}\right)$ . Substituting this into Lemma 5.7, we get that distinguishing  $P_0$  and  $P_1$  with constant probability and  $n$  samples requires  $M = \Omega\left(\frac{\sigma}{\epsilon\sqrt{n}}\right)$ . Thus, for appropriately small  $\delta$ , any  $(\epsilon, \delta)$ -locally private protocol that  $(\alpha, \beta)$ -solves Estimate  $(n, M, \sigma)$  has  $\alpha = \Omega(M) = \Omega\left(\frac{\sigma}{\epsilon\sqrt{n}}\right)$ .

## 6 Information Theory Overview

We briefly review some standard facts and definitions from information theory, starting with entropy.

**Definition 6.1.** The entropy  $H(X)$  of a random variable  $X$  is

$$H(X) = \sum_x \mathbb{P}[X = x] \ln\left(\frac{1}{\mathbb{P}[X = x]}\right),$$

and the conditional entropy  $H(X|Y)$  of random variable  $X$  conditioned on random variable  $Y$  is

$$H(X|Y) = \mathbb{E}_y[H(X|Y = y)].$$

Next, we can use entropy to define the mutual information between two random variables. Mutual information between random variables  $X$  and  $Y$  is roughly the amount by which conditioning on  $Y$  reduces the entropy of  $X$  (and vice-versa).

**Definition 6.2.** The mutual information  $I(X; Y)$  between two random variables  $X$  and  $Y$  is

$$I(X; Y) = H(X) - H(X|Y) = H(Y) - H(Y|X),$$

and the conditional mutual information  $I(X; Y|Z)$  between  $X$  and  $Y$  given  $Z$  is

$$I(X; Y|Z) = H(X|Z) - H(X|Y, Z) = H(Y|Z) - H(Y|X, Z).$$

We also define the related notion of KL-divergence.

**Definition 6.3.** The Kullback-Leibler divergence  $D_{KL}(X \| Y)$  between two random variables  $X$  and  $Y$  is

$$D_{KL}(X \| Y) = \sum_x \mathbb{P}[X = x] \ln\left(\frac{\mathbb{P}[X = x]}{\mathbb{P}[Y = x]}\right),$$

where we often abuse notation and let  $X$  and  $Y$  denote the distributions associated with  $X$  and  $Y$ .



409 KL divergence connects to mutual information as follows.

410 **Fact 6.4.** For random variables  $X$ ,  $Y$ , and  $Z$ ,

$$I(X; Y|Z) = \mathbb{E}_{x,z} [D_{KL}((Y|X = x, Z = z) \parallel (Y|Z = z))].$$

411 Finally, we will also use the following connection between KL divergence and  $\|\cdot\|_1$  distance.

412 **Lemma 6.5** (Pinsker's inequality). For random variables  $X$  and  $Y$ ,

$$\|X - Y\|_1 \leq \sqrt{2D_{KL}(X \parallel Y)}.$$

## 413 References

- 414 [1] Mark Braverman, Ankit Garg, Tengyu Ma, Huy L Nguyen, and David P Woodruff. Commu-  
415 nication lower bounds for statistical estimation problems via a distributed data processing inequality.  
416 In *Symposium on the Theory of Computing (STOC)*, 2016.
- 417 [2] Mark Bun, Jelani Nelson, and Uri Stemmer. Heavy hitters and the structure of local privacy. In  
418 *Symposium on Principles of Database Systems (PODS)*, 2018.
- 419 [3] T.-H. Hubert Chan, Elaine Shi, and Dawn Song. Private and continual release of statistics. *ACM*  
420 *Trans. Inf. Syst. Secur.*, 2011.
- 421 [4] Albert Cheu, Adam Smith, Jonathan Ullman, David Zeber, and Maxim Zhilyaev. Distributed  
422 differential privacy via mixnets. In *International Conference on Theory and Application of*  
423 *Cryptographic Techniques (EUROCRYPT)*, 2019.
- 424 [5] John C Duchi, Michael I Jordan, and Martin J Wainwright. Local privacy and statistical minimax  
425 rates. In *Foundations of Computer Science (FOCS)*, 2013.
- 426 [6] Cynthia Dwork, Aaron Roth, et al. The algorithmic foundations of differential privacy. *Founda-*  
427 *tions and Trends® in Theoretical Computer Science*, 2014.
- 428 [7] Matthew Joseph, Jieming Mao, Seth Neel, and Aaron Roth. The role of interactivity in local  
429 differential privacy. In *Foundations of Computer Science (FOCS)*, 2019.
- 430 [8] Maxim Raginsky. Strong data processing inequalities and  $\phi$ -sobolev inequalities for discrete  
431 channels. *IEEE Transactions on Information Theory*, 62(6):3355–3389, 2016.
